# Supplementary material
Source: PubMed Central journal article supplement (PMC8785851)
Supplement: 7639_3_supp_88704_qyzjl0.pdf [file 7639_3_supp_88704_qyzjl0.pdf]

## **Supplementary information**

### **Identification of diabetic nephropathy in patients undergoing kidney biopsy through blood and urinary profiles of D-serine**

Yukimasa Iwata, Hiroki Okushima, Atsushi Hesaka,  
Masataka Kawamura, Ryoichi Imamura, Shiro Takahara, Masaru Horio,  
Yoko Tanaka, Tatsuhiko Ikeda, Maiko Nakane, Masashi Mita,  
Terumasa Hayashi, Yoshitaka Isaka, Tomonori Kimura

**5 Supplementary figures**

**3 Supplementary tables**

## Supplementary Figure S1

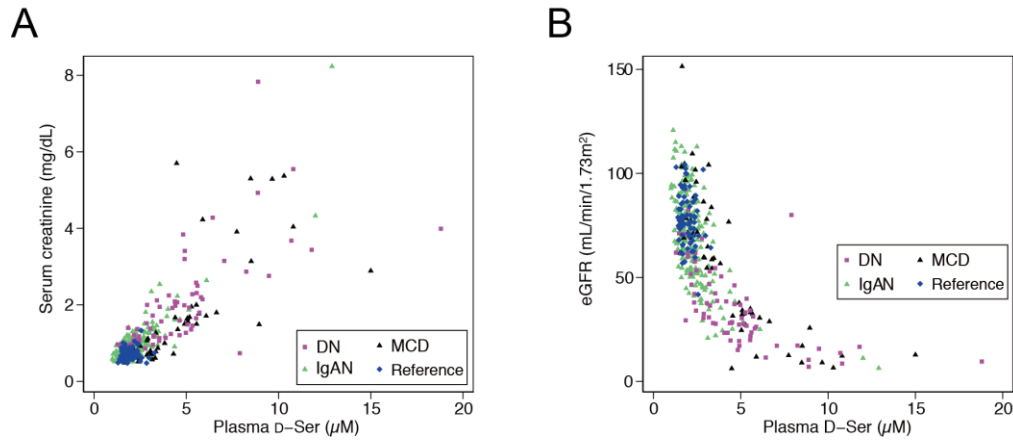

**Supplementary Figure 1. Plasma level of D-serine and kidney function.** (A and B) Scatter plot of plasma level of D-serine with (A) serum level of creatinine and (B) estimated glomerular filtration rate (eGFR). Values are shown without logarithm transformation. DN, diabetic nephropathy; MCD, minimal change disease; IgAN, IgA nephropathy; reference, non-kidney disease participants.

## Supplementary Figure S2

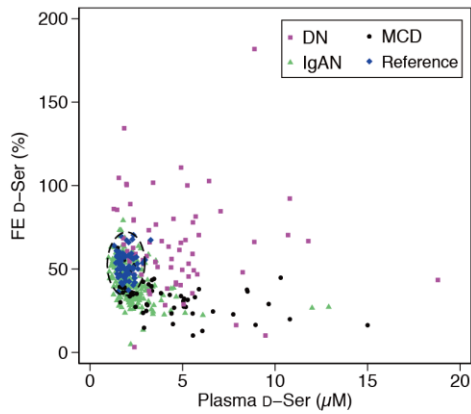

**Supplementary Figure 2. Scatter plots of plasma level and fractional excretion (FE) of D-serine in patients with all participants.** Values are shown without logarithm transformation. The eclipse represents 95% confidence interval of reference (non-kidney disease participants). DN, diabetic nephropathy; MCD, minimal change disease; IgAN, IgA nephropathy.

## Supplementary Figure S3

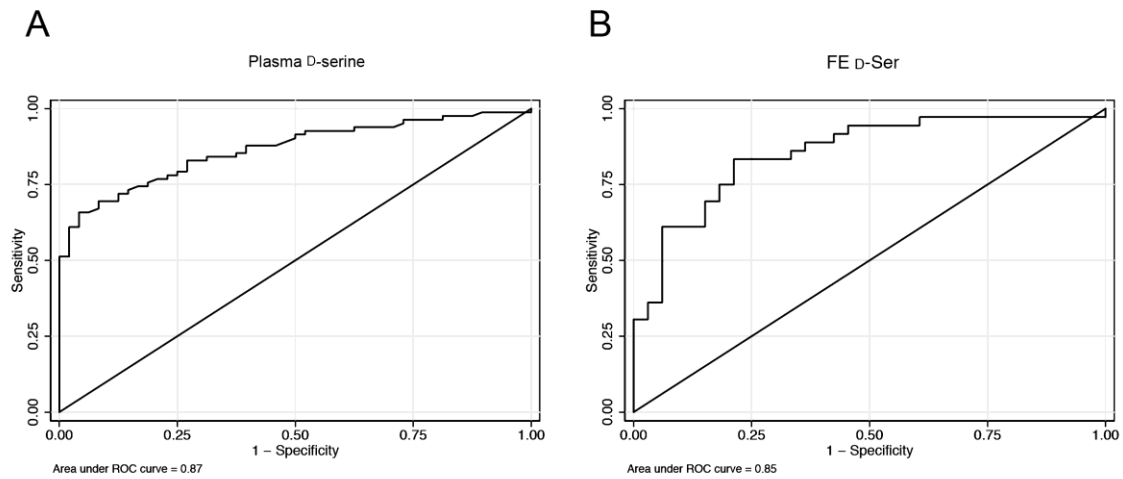

**Supplementary Figure 3. Detection of diabetic nephropathy (DN) using profiles of D-serine in participants without IgA nephropathy.** (A) Receiver operating characteristic (ROC) curve analysis of plasma level of D-serine in eliminating reference (non-kidney disease participants) from kidney diseases in prediction dataset. (B) ROC curve analysis of urinary fractional excretion (FE) of D-serine in separating DN from other diseases in prediction dataset with the plasma level of D-serine above 2.34  $\mu\text{M}$ .

## Supplementary Figure S4

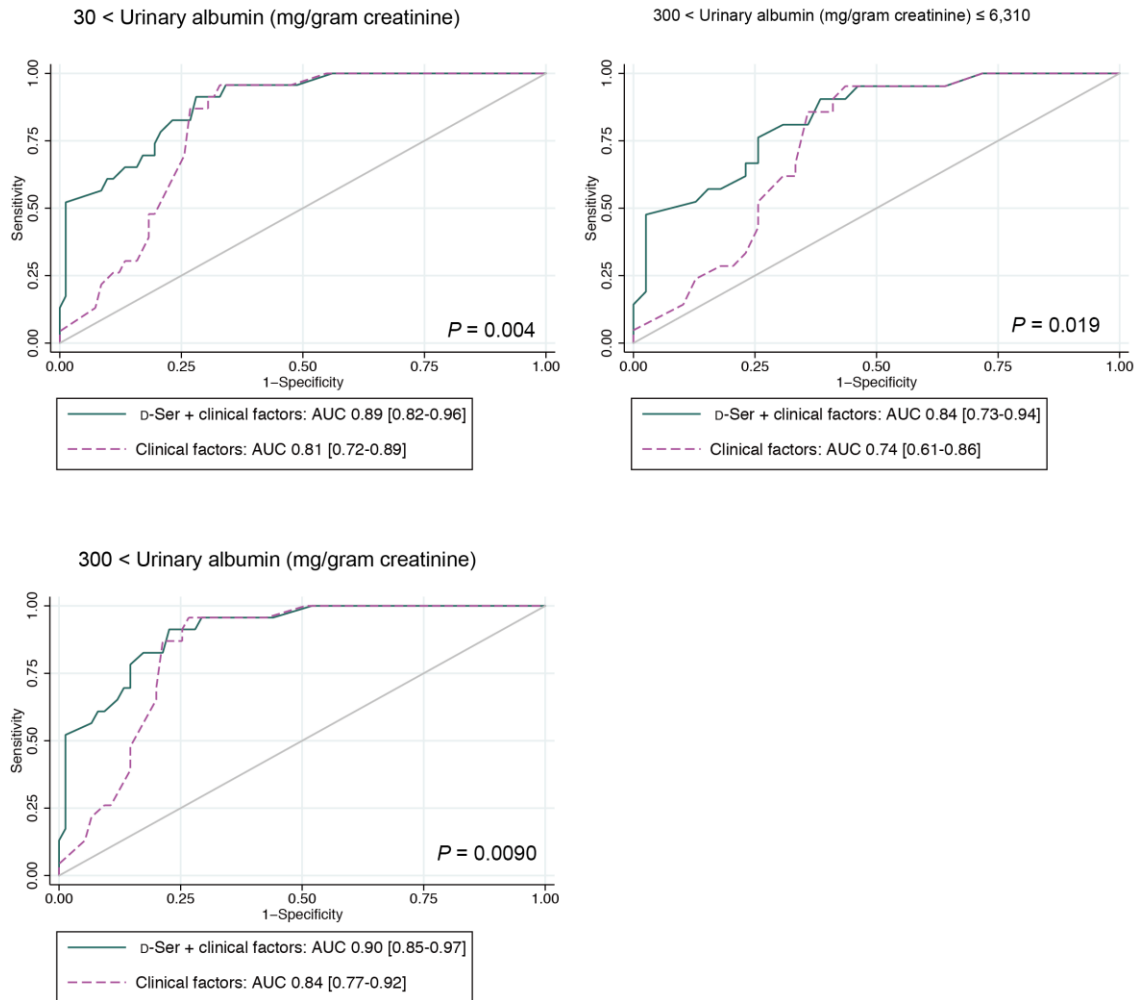

**Supplementary Figure 4. Combination of D-serine and clinical factors for the detection of diabetic nephropathy.** Receiver operating characteristic (ROC) curve analysis of plasma-high and fractional excretion (FE)-high profile of D-serine with clinical factors (age, sex, estimated glomerular filtration rate [eGFR], and presence of albuminuria) in validation dataset of several ranges of albuminuria.

## Supplementary Figure S5

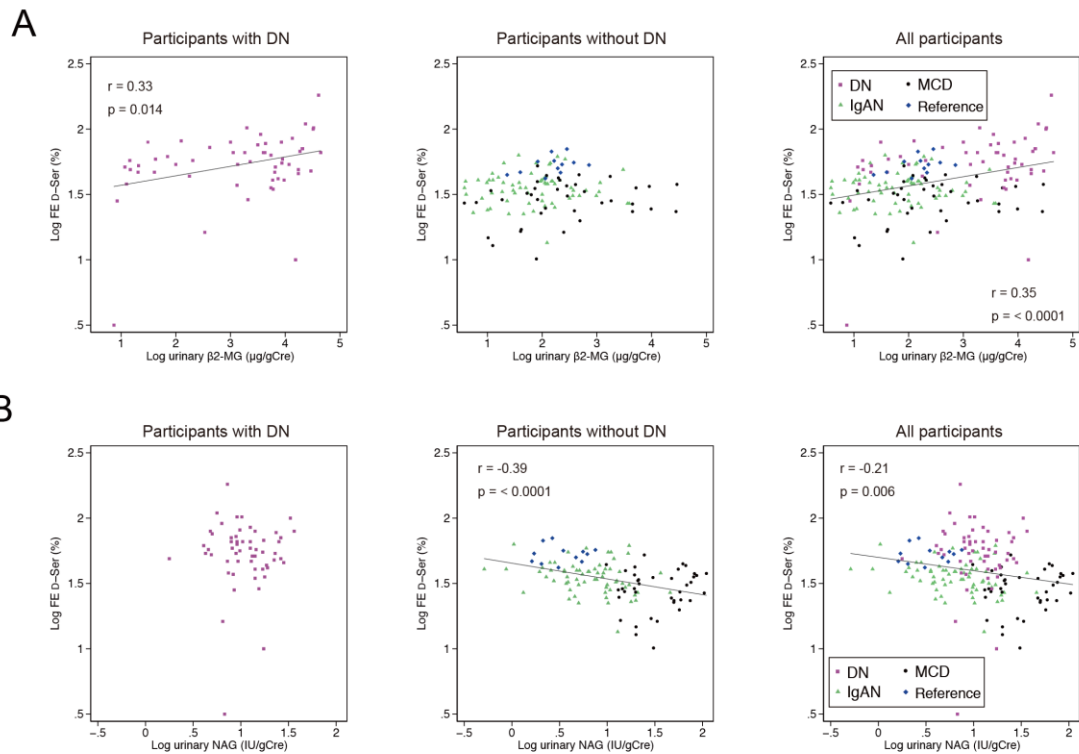

**Supplementary Figure 5. Relation of fractional excretion (FE) of D-serine and clinical parameters in patients with plasma level of D-serine above 2.34  $\mu\text{M}$ .** (A and B) Scatter plots for FE of D-serine with (A)  $\beta$ 2-microglobulin ( $\beta$ 2-MG) and (B) N-acetyl- $\beta$ -D-glucosaminidase (NAG) were shown in participants with or without diabetic nephropathy (DN), or in all participants. MCD, minimal change disease; IgAN, IgA nephropathy; reference, non-kidney disease participants. Values are transformed to common logarithm.

**Table S1.** Baseline characteristics of the study.

|                                                    | Diabetic nephropathy<br>(n = 69) | Minimal change disease<br>(n = 53) | IgA nephropathy<br>(n = 194) | Reference<br>(n = 72)  |
|----------------------------------------------------|----------------------------------|------------------------------------|------------------------------|------------------------|
| Serum sodium, mEq/L                                | 140 ( 138 - 141 )                | 139 ( 138 - 141 )                  | 140 ( 139 - 141 )            | 140 ( 138 - 141 )      |
| Serum potassium, mEq/L                             | 4.1 ( 3.8 - 4.4 )                | 4.0 ( 3.8 - 4.4 )                  | 4.1 ( 3.9 - 4.3 )            | 4.0 ( 3.8 - 4.2 )      |
| Serum chloride, mEq/L                              | 107 ( 102 - 108 )                | 105 ( 103 - 109 )                  | 105 ( 104 - 107 )            | 103 ( 103 - 105 )      |
| Serum adjusted calcium, mg/dL                      | 9.4 ( 9.1 - 9.8 )                | 9.8 ( 9.6 - 10.1 )                 | 9.3 ( 9.1 - 9.5 )            | 9.2 ( 9.1 - 9.4 )      |
| Serum inorganic phosphate, mg/dL                   | 3.7 ( 3.1 - 4.2 )                | 4.0 ( 3.5 - 4.3 )                  | 3.3 ( 3.0 - 3.7 )            | 3.4 ( 3.1 - 3.6 )      |
| Serum AST, U/L                                     | 21.0 ( 16.0 - 32.0 )             | 23.0 ( 18.0 - 32.0 )               | 20.0 ( 17.0 - 23.0 )         | 19.5 ( 16.8 - 22.3 )   |
| Serum ALT, U/L                                     | 18.0 ( 11.0 - 26.0 )             | 17.0 ( 12.0 - 24.0 )               | 17.0 ( 12.0 - 23.0 )         | 15.5 ( 12.0 - 20.3 )   |
| Serum total cholesterol, mg/dL                     | 190 ( 162 - 224 )                | 339 ( 278 - 450 )                  | 198 ( 179 - 218 )            | 192 ( 169 - 214 )      |
| Serum triglyceride, mg/dL                          | 156 ( 128 - 207 )                | 195 ( 143 - 233 )                  | 107 ( 76 - 162 )             | 90 ( 67 - 125 )        |
| Serum LDL, mg/dL                                   | 107 ( 87 - 129 )                 | 213 ( 161 - 292 )                  | 112 ( 94 - 134 )             | 115 ( 95 - 127 )       |
| Serum LDH, U/L                                     | 224 ( 196 - 250 )                | 230 ( 202 - 275 )                  | 185 ( 159 - 208 )            | 159 ( 14 - 176 )       |
| Serum IgG, mg/dL                                   | 1028 ( 797 - 1219 )              | 526 ( 432 - 673 )                  | 1082 ( 848 - 1302 )          | 1110 ( 947 - 1184 )    |
| Serum IgA, mg/dL                                   | 272 ( 224 - 407 )                | 265 ( 206 - 327 )                  | 303 ( 236 - 401 )            | 190 ( 152 - 246 )      |
| Serum IgM, mg/dL                                   | 83 ( 51 - 123 )                  | 86 ( 65 - 145 )                    | 93 ( 66 - 135 )              | 64 ( 41 - 100 )        |
| Serum C3, mg/dL                                    | 110.3 ( 99.3 - 123.8 )           | 129.0 ( 112.0 - 149.0 )            | 101.5 ( 90.0 - 117.8 )       | 100.0 ( 90.8 - 113.0 ) |
| Serum C4, mg/dL                                    | 30.3 ( 25.9 - 34.8 )             | 37.0 ( 30.0 - 44.0 )               | 25.9 ( 21.0 - 30.7 )         | 24.0 ( 19.0 - 28.3 )   |
| Blood white blood cell, $\times 10^3 /\mu\text{L}$ | 6.7 ( 5.2 - 8.1 )                | 5.8 ( 5.0 - 7.5 )                  | 6.6 ( 5.4 - 7.5 )            | 5.6 ( 4.7 - 6.4 )      |
| Blood hemoglobin, g/dL                             | 11.8 ( 10.6 - 13.6 )             | 13.1 ( 11.8 - 14.1 )               | 13.4 ( 12.2 - 14.5 )         | 13.7 ( 12.5 - 14.8 )   |
| Blood platelet $\times 10^3 /\mu\text{L}$          | 225 ( 183.0 - 277.0 )            | 255 ( 205.0 - 290.0 )              | 240 ( 205.0 - 274.5 )        | 223 ( 192.7 - 272.5 )  |
| Blood CRP mg/dL                                    | 0.08 ( 0.04 - 0.24 )             | 0.09 ( 0.02 - 0.45 )               | 0.04 ( 0.01 - 0.12 )         | 0.06 ( 0.04 - 0.11 )   |

Values are described as median (IQR). Reference, non-kidney disease participants; AST, aspartate aminotransferase; ALT, alanine aminotransferase; LDL, low density lipoprotein; LDH, lactate dehydrogenase; CRP, C-reactive protein.

**Table S2.** Characteristics of prediction and validation data.

|                                                   | Prediction data<br>( n = 259 ) |        |         |   | Validation data<br>( n = 129 ) |        |         |   | <i>P</i> |
|---------------------------------------------------|--------------------------------|--------|---------|---|--------------------------------|--------|---------|---|----------|
| Serum sodium, mEq/L                               | 140                            | ( 139  | - 141   | ) | 140                            | ( 139  | - 141   | ) | 0.628    |
| Serum potassium, mEq/L                            | 4.1                            | ( 3.9  | - 4.4   | ) | 4.1                            | ( 3.8  | - 4.3   | ) | 0.137    |
| Serum chloride, mEq/L                             | 105                            | ( 103  | - 107   | ) | 105                            | ( 103  | - 107   | ) | 0.452    |
| Serum adjusted calcium, mg/dL                     | 9.3                            | ( 9.1  | - 9.6   | ) | 9.3                            | ( 9.1  | - 9.7   | ) | 0.231    |
| Serum inorganic phosphate, mg/dL                  | 3.4                            | ( 3.1  | - 3.8   | ) | 3.5                            | ( 3.1  | - 4.0   | ) | 0.439    |
| Serum AST, U/L                                    | 20.0                           | ( 17.0 | - 25.0  | ) | 20.0                           | ( 17.0 | - 26.0  | ) | 0.773    |
| Serum ALT, U/L                                    | 17.0                           | ( 12.0 | - 23.0  | ) | 17.0                           | ( 12.0 | - 24.0  | ) | 0.707    |
| Serum total cholesterol, mg/dL                    | 202                            | ( 179  | - 230   | ) | 204                            | ( 178  | - 254   | ) | 0.457    |
| Serum triglyceride, mg/dL                         | 123                            | ( 82   | - 190   | ) | 120                            | ( 82   | - 187   | ) | 0.694    |
| Serum LDL, mg/dL                                  | 116                            | ( 95   | - 144   | ) | 120                            | ( 95   | - 150   | ) | 0.584    |
| Serum LDH, U/L                                    | 186                            | ( 161  | - 221   | ) | 193                            | ( 164  | - 237   | ) | 0.260    |
| Serum IgG, mg/dL                                  | 1024                           | ( 769  | - 1228  | ) | 1005                           | ( 768  | - 1200  | ) | 0.563    |
| Serum IgA, mg/dL                                  | 274                            | ( 216  | - 371   | ) | 253                            | ( 191  | - 356   | ) | 0.516    |
| Serum IgM, mg/dL                                  | 83                             | ( 57   | - 125   | ) | 93                             | ( 59   | - 129   | ) | 0.875    |
| Serum C3, mg/dL                                   | 107.0                          | ( 93.2 | - 123.5 | ) | 105.8                          | ( 93.0 | - 119.7 | ) | 0.901    |
| Serum C4, mg/dL                                   | 27.0                           | ( 22.4 | - 33.5  | ) | 27.0                           | ( 21.3 | - 34.8  | ) | 0.639    |
| Blood white blood cell, $\times 10^3/\mu\text{L}$ | 6.9                            | ( 5.3  | - 8.8   | ) | 6.8                            | ( 5.9  | - 8.6   | ) | 0.600    |
| Blood hemoglobin, g/dL                            | 13.1                           | ( 12.1 | - 14.5  | ) | 13.5                           | ( 12.3 | - 14.4  | ) | 0.679    |
| Blood platelet $\times 10^3/\mu\text{L}$          | 233                            | ( 170  | - 268   | ) | 227                            | ( 161  | - 270   | ) | 0.755    |
| Blood CRP mg/dL                                   | 0.07                           | ( 0.03 | - 0.16  | ) | 0.07                           | ( 0.02 | - 0.11  | ) | 0.704    |

Values are described as median (IQR). AST, aspartate aminotransferase; ALT, alanine aminotransferase; LDL, low density lipoprotein; LDH, lactate dehydrogenase; CRP, C-reactive protein.



**Table S3.** Logistic regression analysis of D-serine profile in the detection of diabetic nephropathy (DN).

| Variables                              |           | Unadjusted odds ratio | <i>P</i> | Adjusted odds ratio | <i>P</i> |
|----------------------------------------|-----------|-----------------------|----------|---------------------|----------|
| Independent                            | Dependent |                       |          |                     |          |
| Plasma-high & FE-high<br>D-Ser profile | DN        | 24.8 ( 11.1 - 55.2 )  | <0.001   | 14.7 ( 6.0 - 36.1 ) | <0.001   |

Analysis was performed with the prediction data. Odds ratios were adjusted for age over 60 years, sex, urinary albumin level per 1 g/gram creatinine, and estimated glomerular filtration rate over 60 mL/min/1.73 m<sup>2</sup>.
